# Supplementary material
Source: Springer Nature journal article supplement (https://www.springermedizin.de/resource/supplementary/12916_2009_273_MOESM2_ESM.pdf/9599536)
Supplement: MOESM2 [file 9599536]

**A**

|           |           |            |           |            |           |            |           |           |           |          |          |               |
|-----------|-----------|------------|-----------|------------|-----------|------------|-----------|-----------|-----------|----------|----------|---------------|
|           | 1         | 10         | 20        | 30         | 40        | 50         | 60        | 70        | 80        | 90       | 100      |               |
| Mitf-M    | ATGCTGGA  | AATGCTAG   | AATAAATCA | CTATCAG    | GTGCAGAC  | CCACCTCG   | AAAACCCC  | ACCAAGT   | ACCACAT   | ACAGCAAG | CCCAACGG | CAGCAGGTAAAGC |
| Mitf-Mdel | ATGCTGGA  | AATGCTAG   | AATAAATCA | CTATCAG    | GTGCAGAC  | CCACCTCG   | AAAACCCC  | ACCAAGT   | ACCACAT   | ACAGCAAG | CCCAACGG | CAGCAG-----   |
| Mitf-M    | AGTACCTTT | CTACCACTTT | AGCAAATAA | ACATGCCAAC | CAAGTCCTG | AGCTTGCCAT | GTCCAAACC | AGCCTGGCG | ATCATGTCA | TGCCACCG | GTGCCGGG |               |
| Mitf-Mdel | AGTACCTTT | CTACCACTTT | AGCAAATAA | ACATGCCAAC | CAAGTCCTG | AGCTTGCCAT | GTCCAAACC | AGCCTGGCG | ATCATGTCA | TGCCACCG | GTGCCGGG |               |
| Mitf-M    | GAGCAGCGC | ACCAACAG   | CCCCATGG  | CTATGCTT   | ACGCTTAA  | CTCAACTGT  | GAAAAAGAG | GGATTTT   | TATAAGTTT | GAAGAGCA | AAACAGGG | CAGAGAGC      |
| Mitf-Mdel | GAGCAGCGC | ACCAACAG   | CCCCATGG  | CTATGCTT   | ACGCTTAA  | CTCAACTGT  | GAAAAAGAG | GGATTTT   | TATAAGTTT | GAAGAGCA | AAACAGGG | CAGAGAGC      |
| Mitf-M    | GAGTGCCCA | GGCATGA    | ACACACAT  | TCACGAG    | CGTCCTGT  | ATGCAG     | ATGGATG   | ATGTAAT   | CGATGAC   | ATCATTAG | CCTAGAAT | CAAGTTATAA    |
| Mitf-Mdel | GAGTGCCCA | GGCATGA    | ACACACAT  | TCACGAG    | CGTCCTGT  | ATGCAG     | ATGGATG   | ATGTAAT   | CGATGAC   | ATCATTAG | CCTAGAAT | CAAGTTATAA    |
| Mitf-M    | TCTTGGGCT | TGATGGAT   | CCTGCTTT  | GCAAATGG   | CAATACG   | TTGCCTGT   | CTCGGAA   | ACTTGATT  | GATCTTT   | ATGGAA   | ACCAAGG  | TCTGCC        |
| Mitf-Mdel | TCTTGGGCT | TGATGGAT   | CCTGCTTT  | GCAAATGG   | CAATACG   | TTGCCTGT   | CTCGGAA   | ACTTGATT  | GATCTTT   | ATGGAA   | ACCAAGG  | TCTGCC        |
| Mitf-M    | CCTCACCAT | CAGCAACT   | CCTGTCC   | AGCCAACT   | TCCCAAC   | ATAAAA     | AGGGAG    | CTCACAG   | CGTGTAT   | TTTTTCC  | CACAGAG  | TCTGAAG       |
| Mitf-Mdel | CCTCACCAT | CAGCAACT   | CCTGTCC   | AGCCAACT   | TCCCAAC   | ATAAAA     | AGGGAG    | CTCACAG   | CGTGTAT   | TTTTTCC  | CACAGAG  | TCTGAAG       |
| Mitf-M    | AAAGAGAGG | CAGAAAA    | AGGACAAT  | CACAACCT   | GATTGA    | ACGAAGA    | AAGATTT   | AACATAA   | ATGACCG   | CATTAA   | AGAACT   | AGGTACT       |
| Mitf-Mdel | AAAGAGAGG | CAGAAAA    | AGGACAAT  | CACAACCT   | GATTGA    | ACGAAGA    | AAGATTT   | AACATAA   | ATGACCG   | CATTAA   | AGAACT   | AGGTACT       |
| Mitf-M    | CAAATGAT  | CCAGACAT   | GCGCTGG   | AACAAGG    | GAACCAT   | CTTAAA     | AGCATCC   | GTGGACT   | ATATCC    | GAAAGT   | TGCAAC   | GAGAAC        |
| Mitf-Mdel | CAAATGAT  | CCAGACAT   | GCGCTGG   | AACAAGG    | GAACCAT   | CTTAAA     | AGCATCC   | GTGGACT   | ATATCC    | GAAAGT   | TGCAAC   | GAGAAC        |
| Mitf-M    | TGAAAACCG | ACAGAAG    | AACTGG    | AGCACGCC   | AACCGGC   | ATTTGTT    | GCTCAGA   | ATACAG    | GAACTT    | GAAATG   | CAGGCT   | CGAGCT        |
| Mitf-Mdel | TGAAAACCG | ACAGAAG    | AACTGG    | AGCACGCC   | AACCGGC   | ATTTGTT    | GCTCAGA   | ATACAG    | GAACTT    | GAAATG   | CAGGCT   | CGAGCT        |
| Mitf-M    | CCATCCAC  | GGTCTCT    | GCTCTCC   | AGATTTG    | GTGAATC   | GGATCAT    | CAAGCA    | AAGAAC    | CCGTTCT   | TGAGAA   | CTGCAG   | CCAAGAC       |
| Mitf-Mdel | CCATCCAC  | GGTCTCT    | GCTCTCC   | AGATTTG    | GTGAATC   | GGATCAT    | CAAGCA    | AAGAAC    | CCGTTCT   | TGAGAA   | CTGCAG   | CCAAGAC       |
| Mitf-M    | ACCTAAC   | CTGTACA    | ACAAC     | TCTCGAT    | CTCACG    | GATGGC     | ACCATC    | ACCTTCA   | ACAACA    | ACCTCG   | GAACTG   | GGGACT        |
| Mitf-Mdel | ACCTAAC   | CTGTACA    | ACAAC     | TCTCGAT    | CTCACG    | GATGGC     | ACCATC    | ACCTTCA   | ACAACA    | ACCTCG   | GAACTG   | GGGACT        |
| Mitf-M    | CACAAAA   | ATGGGAT    | CCAACT    | GGAAGAC    | ATCCTG    | ATGGAC     | GACACC    | TTTCTCC   | CGTCCG    | TGTCAC   | TGATCC   | ACTCCT        |
| Mitf-Mdel | CACAAAA   | ATGGGAT    | CCAACT    | GGAAGAC    | ATCCTG    | ATGGAC     | GACACC    | TTTCTCC   | CGTCCG    | TGTCAC   | TGATCC   | ACTCCT        |
| Mitf-M    | TCCAAA    | ACAAGC     | AGCCGG    | AGGAGC     | AGTATG    | AGCATG     | GGAAG     | AGACGG    | AGCAC     | ACTTGT   | TAG      |               |
| Mitf-Mdel | TCCAAA    | ACAAGC     | AGCCGG    | AGGAGC     | AGTATG    | AGCATG     | GGAAG     | AGACGG    | AGCAC     | ACTTGT   | TAG      |               |

**B**

|           |         |        |        |        |        |         |        |        |
|-----------|---------|--------|--------|--------|--------|---------|--------|--------|
|           | 1       | 10     | 20     | 30     | 40     | 50      | 60     | 70     |
| Mitf-M    | MLEMLEY | NHYQVQ | THLEN  | PTKYH  | IQQAQR | QVKQYL  | STTLAN | KHANQV |
| Mitf-Mdel | MLEMLEY | NHYQVQ | THLEN  | PTKYH  | IQQAQR | QV----- |        |        |
| Mitf-M    | PNSPMAM | LTLSN  | CEKEG  | FYKFEE | QNRASE | ECPGMN  | THSRAS | CMQMD  |
| Mitf-Mdel | PNSPMAM | LTLSN  | CEKEG  | FYKFEE | QNRASE | ECPGMN  | THSRAS | CMQMD  |
| Mitf-M    | ALQMANT | LPVSG  | NLIDLY | GNQGL  | PPPGL  | TISNSC  | PANLP  | NIKREL |
| Mitf-Mdel | ALQMANT | LPVSG  | NLIDLY | GNQGL  | PPPGL  | TISNSC  | PANLP  | NIKREL |
| Mitf-M    | LIERRRR | FNINDR | IKELG  | TLPKSN | DMRW   | NKGT    | LKASV  | DIYRKL |
| Mitf-Mdel | LIERRRR | FNINDR | IKELG  | TLPKSN | DMRW   | NKGT    | LKASV  | DIYRKL |
| Mitf-M    | LLLRIQE | LEMQA  | RAHGL  | SLIPST | GLCSP  | DLVNR   | IKQEP  | VLENC  |
| Mitf-Mdel | LLLRIQE | LEMQA  | RAHGL  | SLIPST | GLCSP  | DLVNR   | IKQEP  | VLENC  |
| Mitf-M    | NNNLGT  | GTEAN  | QAYSV  | PTKMG  | SKLED  | ILMDD   | TLSPV  | GVTD   |
| Mitf-Mdel | NNNLGT  | GTEAN  | QAYSV  | PTKMG  | SKLED  | ILMDD   | TLSPV  | GVTD   |
